# Supplementary material for: Transgenic expression of cyclooxygenase-2 (COX2) causes premature aging phenotypes in mice
Source: publisher site journal article supplement (doi:10.18632/aging.101060), 2016-10-07
Supplement: Supplementary file 1 [file aging-v8i10-101060-supplementary-material-SD1.pdf]

### Supplementary FIG. 1

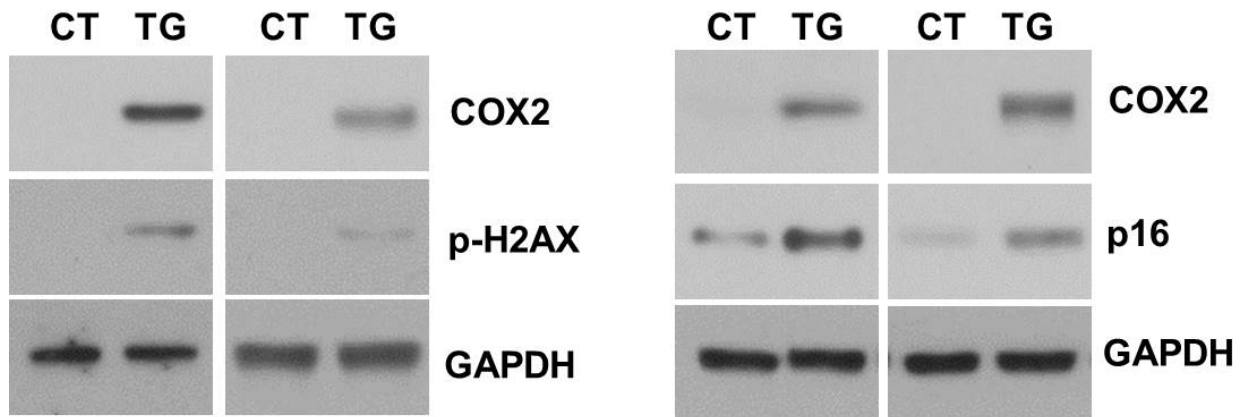

Western blot analysis of COX2, phospho-H2AX, and p16 in pancreas of control (CT) and COX2 transgenic (TG) mice.

### Supplementary FIG. 2

**A**

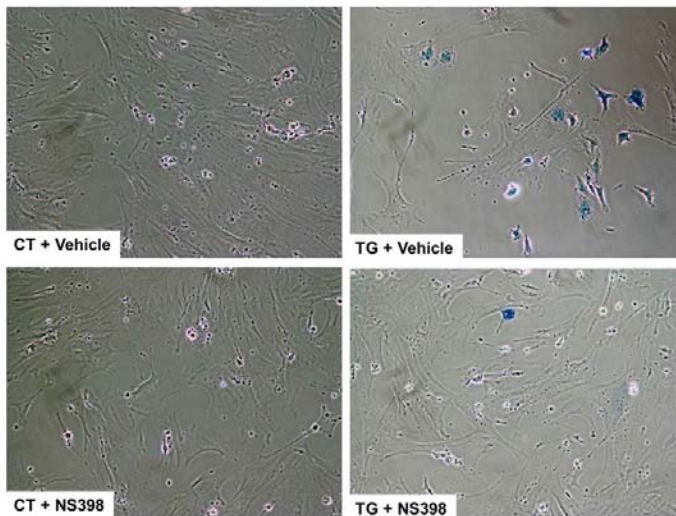

**B**

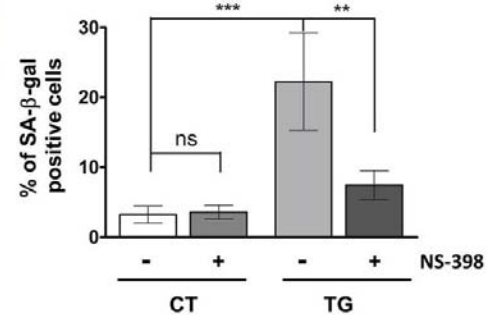

**(A)** Adult mouse lung fibroblasts from control and COX2 transgenic mice were incubated with 4-hydroxytamoxifen for 24 hours to induce COX2 expression in transgenic fibroblasts. The cells were cultured in the regular culture media containing DMSO or 10  $\mu$ M NS398 for 72 hours before SA- $\beta$ -Gal staining. Quantification results are shown in **(B)**.
